# Supplementary material for: Efficient scan mask techniques for connected components labeling algorithm
Source: Springer Nature journal article supplement (doi:10.1186/1687-5281-2011-14), 2011-10-06
Supplement: 13640_2011_13_MOESM2_ESM.pdf [file 13640_2011_13_MOESM2_ESM.pdf]

|          |          |          |          |          |          |
|----------|----------|----------|----------|----------|----------|
| <i>a</i> | <i>b</i> | <i>c</i> | <i>d</i> | <i>e</i> | <i>f</i> |
| <i>g</i> | <i>h</i> | <i>i</i> | <i>j</i> | <i>k</i> | <i>l</i> |
| <i>m</i> | <i>n</i> | <i>o</i> | <i>p</i> |          |          |
| <i>q</i> | <i>r</i> | <i>s</i> | <i>t</i> |          |          |

(a)

|          |          |          |
|----------|----------|----------|
| <b>P</b> | <b>Q</b> | <b>R</b> |
| <b>S</b> | <b>X</b> |          |

(b)
