# Supplementary material for: Efficient scan mask techniques for connected components labeling algorithm
Source: Springer Nature journal article supplement (doi:10.1186/1687-5281-2011-14), 2011-10-06
Supplement: 13640_2011_13_MOESM4_ESM.pdf [file 13640_2011_13_MOESM4_ESM.pdf]

|          |          |          |          |   |   |
|----------|----------|----------|----------|---|---|
| <b>a</b> | <b>b</b> | <b>c</b> | <b>d</b> | e | f |
| <b>g</b> | <b>h</b> | <b>i</b> | <b>j</b> | k | l |
| <b>m</b> | <b>n</b> | <b>o</b> | <b>p</b> |   |   |
| <b>q</b> | <b>r</b> | <b>s</b> | <b>t</b> |   |   |

(a)

|          |          |   |
|----------|----------|---|
| <b>P</b> | <b>Q</b> | R |
| <b>S</b> | <b>X</b> |   |

(b)
