# Supplementary material for: Efficient scan mask techniques for connected components labeling algorithm
Source: Springer Nature journal article supplement (doi:10.1186/1687-5281-2011-14), 2011-10-06
Supplement: 13640_2011_13_MOESM7_ESM.pdf [file 13640_2011_13_MOESM7_ESM.pdf]

|   |   |   |
|---|---|---|
| p | q | r |
| s | x |   |

(1)

|   |   |   |
|---|---|---|
| p | q | r |
| s | x |   |

(2)

|   |   |   |
|---|---|---|
| p | q | r |
| s | x |   |

(3)

|   |   |   |
|---|---|---|
| p | q | r |
| s | x |   |

(4)

|   |   |   |
|---|---|---|
| p | q | r |
| s | x |   |

(5)

|   |   |   |
|---|---|---|
| p | q | r |
| s | x |   |

(6)

|   |   |   |
|---|---|---|
| p | q | r |
| s | x |   |

(7)

|   |   |   |
|---|---|---|
| p | q | r |
| s | x |   |

(8)

|   |   |   |
|---|---|---|
| p | q | r |
| s | x |   |

(9)

|   |   |   |
|---|---|---|
| p | q | r |
| s | x |   |

(10)

|   |   |   |
|---|---|---|
| p | q | r |
| s | x |   |

(11)

|   |   |   |
|---|---|---|
| p | q | r |
| s | x |   |

(12)

|   |   |   |
|---|---|---|
| p | q | r |
| s | x |   |

(13)

|   |   |   |
|---|---|---|
| p | q | r |
| s | x |   |

(14)

|   |   |   |
|---|---|---|
| p | q | r |
| s | x |   |

(15)

|   |   |   |
|---|---|---|
| p | q | r |
| s | x |   |

(16)
