# Supplementary material for: Efficient scan mask techniques for connected components labeling algorithm
Source: Springer Nature journal article supplement (doi:10.1186/1687-5281-2011-14), 2011-10-06
Supplement: 13640_2011_13_MOESM8_ESM.pdf [file 13640_2011_13_MOESM8_ESM.pdf]

```
1: If (x==Foreground)
2:   If (q==Foreground)
3:     x=q
4:   else if (s==Foreground)
5:     x=s
6:     if (r==Foreground)
7:       x=r+s
8:   else if (p==Foreground)
9:     x=p
10:    if (r==Foreground)
11:      x=p+r
12:    else if (r==Foreground)
13:      x=r
14:    else
15:      x=new label
16: else
17:   no action
```
