# Supplementary material for: Efficient scan mask techniques for connected components labeling algorithm
Source: Springer Nature journal article supplement (doi:10.1186/1687-5281-2011-14), 2011-10-06
Supplement: 13640_2011_13_MOESM11_ESM.pdf [file 13640_2011_13_MOESM11_ESM.pdf]

```
1: For (y=1; y<=Height; y++)
2:   For (x=1; x<=Width; x++)
3:     If (x==Foreground)
4:       Procedure1;
5:       x++;
6:       while (x==Foreground)
7:         Procedure2;
8:         x++;
9:       end of while
10:    end of if
11:  end of for
12: end of for
```

(a)

```
1:  If (q==Foreground)
2:    x=q
3:  else if (s==Foreground)
4:    x=s
5:    if (r==Foreground)
6:      x=r+s
7:  else if (r==Foreground)
8:    x=r
9:  else
10:   x=new label
```

(b)

```
1:  x=s
2:  if (q==Background) and (r==Foreground)
3:    x=r+s
```

(c)
