# Supplementary material for: Efficient scan mask techniques for connected components labeling algorithm
Source: Springer Nature journal article supplement (doi:10.1186/1687-5281-2011-14), 2011-10-06
Supplement: 13640_2011_13_MOESM13_ESM.pdf [file 13640_2011_13_MOESM13_ESM.pdf]

|   |   |   |
|---|---|---|
| p | q | r |
| s | x |   |

(a) Time 1

|   |   |   |
|---|---|---|
| p | q | r |
| s | x |   |

(b) Time 2
