# Supplementary material for: Efficient scan mask techniques for connected components labeling algorithm
Source: Springer Nature journal article supplement (doi:10.1186/1687-5281-2011-14), 2011-10-06

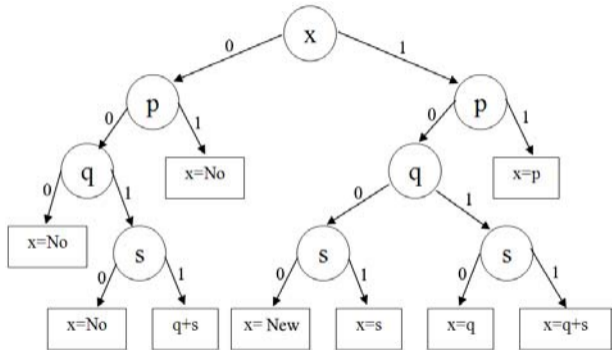

Supplement: 13640_2011_13_MOESM15_ESM.pdf [file 13640_2011_13_MOESM15_ESM.pdf]
