# Supplementary material for: Efficient scan mask techniques for connected components labeling algorithm
Source: Springer Nature journal article supplement (doi:10.1186/1687-5281-2011-14), 2011-10-06
Supplement: 13640_2011_13_MOESM16_ESM.pdf [file 13640_2011_13_MOESM16_ESM.pdf]

|   |   |   |   |
|---|---|---|---|
| a | b | c | d |
| g | h | i | j |
| m | n | o | p |
| q | r | s | t |

|   |   |   |   |
|---|---|---|---|
| a | b | c | d |
| g | h | i | j |
| m | n | o | p |
| q | r | s | t |

|   |   |   |   |
|---|---|---|---|
| a | b | c | d |
| g | h | i | j |
| m | n | o | p |
| q | r | s | t |
