# Supplementary material for: Efficient scan mask techniques for connected components labeling algorithm
Source: Springer Nature journal article supplement (doi:10.1186/1687-5281-2011-14), 2011-10-06
Supplement: 13640_2011_13_MOESM19_ESM.pdf [file 13640_2011_13_MOESM19_ESM.pdf]

1. Randomly assign standard deviation.
2. Create 80 parents
  - 2.1 Initial 13 condition weights by randomly assign real value
  - 2.2 Construct decision tree and evaluate number of leaf nodes
3. Create 100 new offspring by mutation.
  - 3.1 Mutate and sum up ( $a_1$ - $a_{13}$ ).
$$a'_x = a_x + N(0, \sigma^2)$$
where  $x$  is 1-13
  - 3.2 Adjust standard deviation value by applying 1/5 success rule
  - 3.3 Construct decision tree [21] and evaluate the fitness by number of leaf nodes
4. Select the best 80 among parent and offspring to the next generation (lower number of leaf nodes)
5. Repeat step 3 through 4 until 1,000 generations.
