# Supplementary material for: Efficient scan mask techniques for connected components labeling algorithm
Source: Springer Nature journal article supplement (doi:10.1186/1687-5281-2011-14), 2011-10-06
Supplement: 13640_2011_13_MOESM21_ESM.pdf [file 13640_2011_13_MOESM21_ESM.pdf]

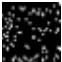

0.1

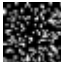

0.2

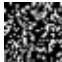

0.3

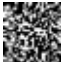

0.4

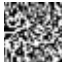

0.5

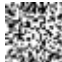

0.6

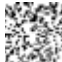

0.7

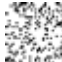

0.8

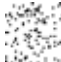

0.9
